# Supplementary material
Source: Springer Nature journal article supplement (https://www.springermedizin.de/resource/supplementary/12889_2012_5979_MOESM1_ESM.pdf/9494054)
Supplement: MOESM1 [file 9494054]

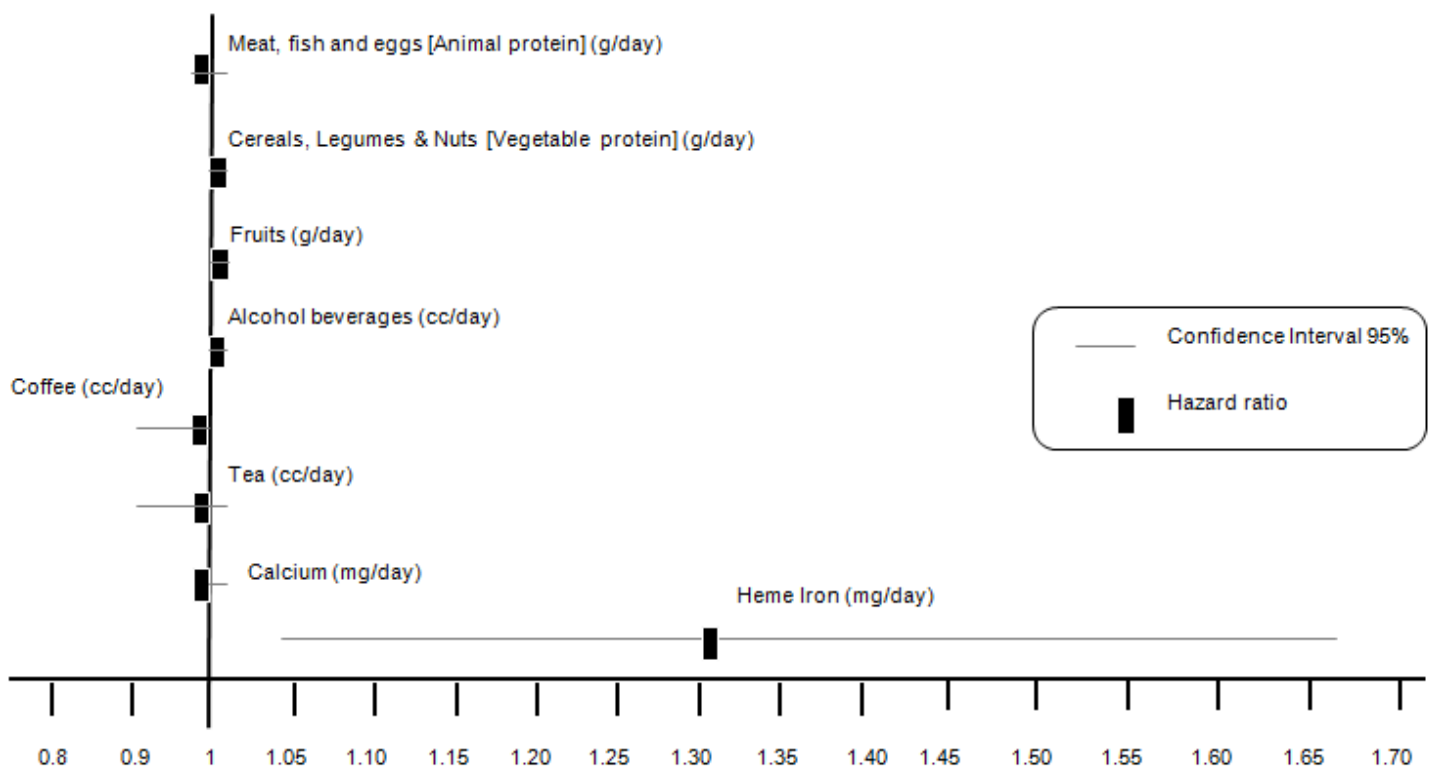

Adjusted for: sex, age (years), energy (kcal/day), waist circumference (cm) ( $p < 0.001$ ;  $\text{Exp}(B) = 1.046$ ), education level (medium-high, low), intervention group (control-0, olive oil-1, nut-2) and smoking (yes, no). (Model significant:  $R^2 = 56.257$ ;  $p < 0.001$ )
